# Supplementary material for: Human semen quality in the new millennium: a prospective cross-sectional population-based study of 4867 men
Source: PubMed Central journal article supplement — BMJ Open. 2012 Jul 2;2(4):e000990. doi: 10.1136/bmjopen-2012-000990 (PMC3391374; doi:10.1136/bmjopen-2012-000990), 2012-07-02
Supplement: bmjopen-2012-000990-s1.pdf [file bmjopen-2012-000990-s1.pdf]

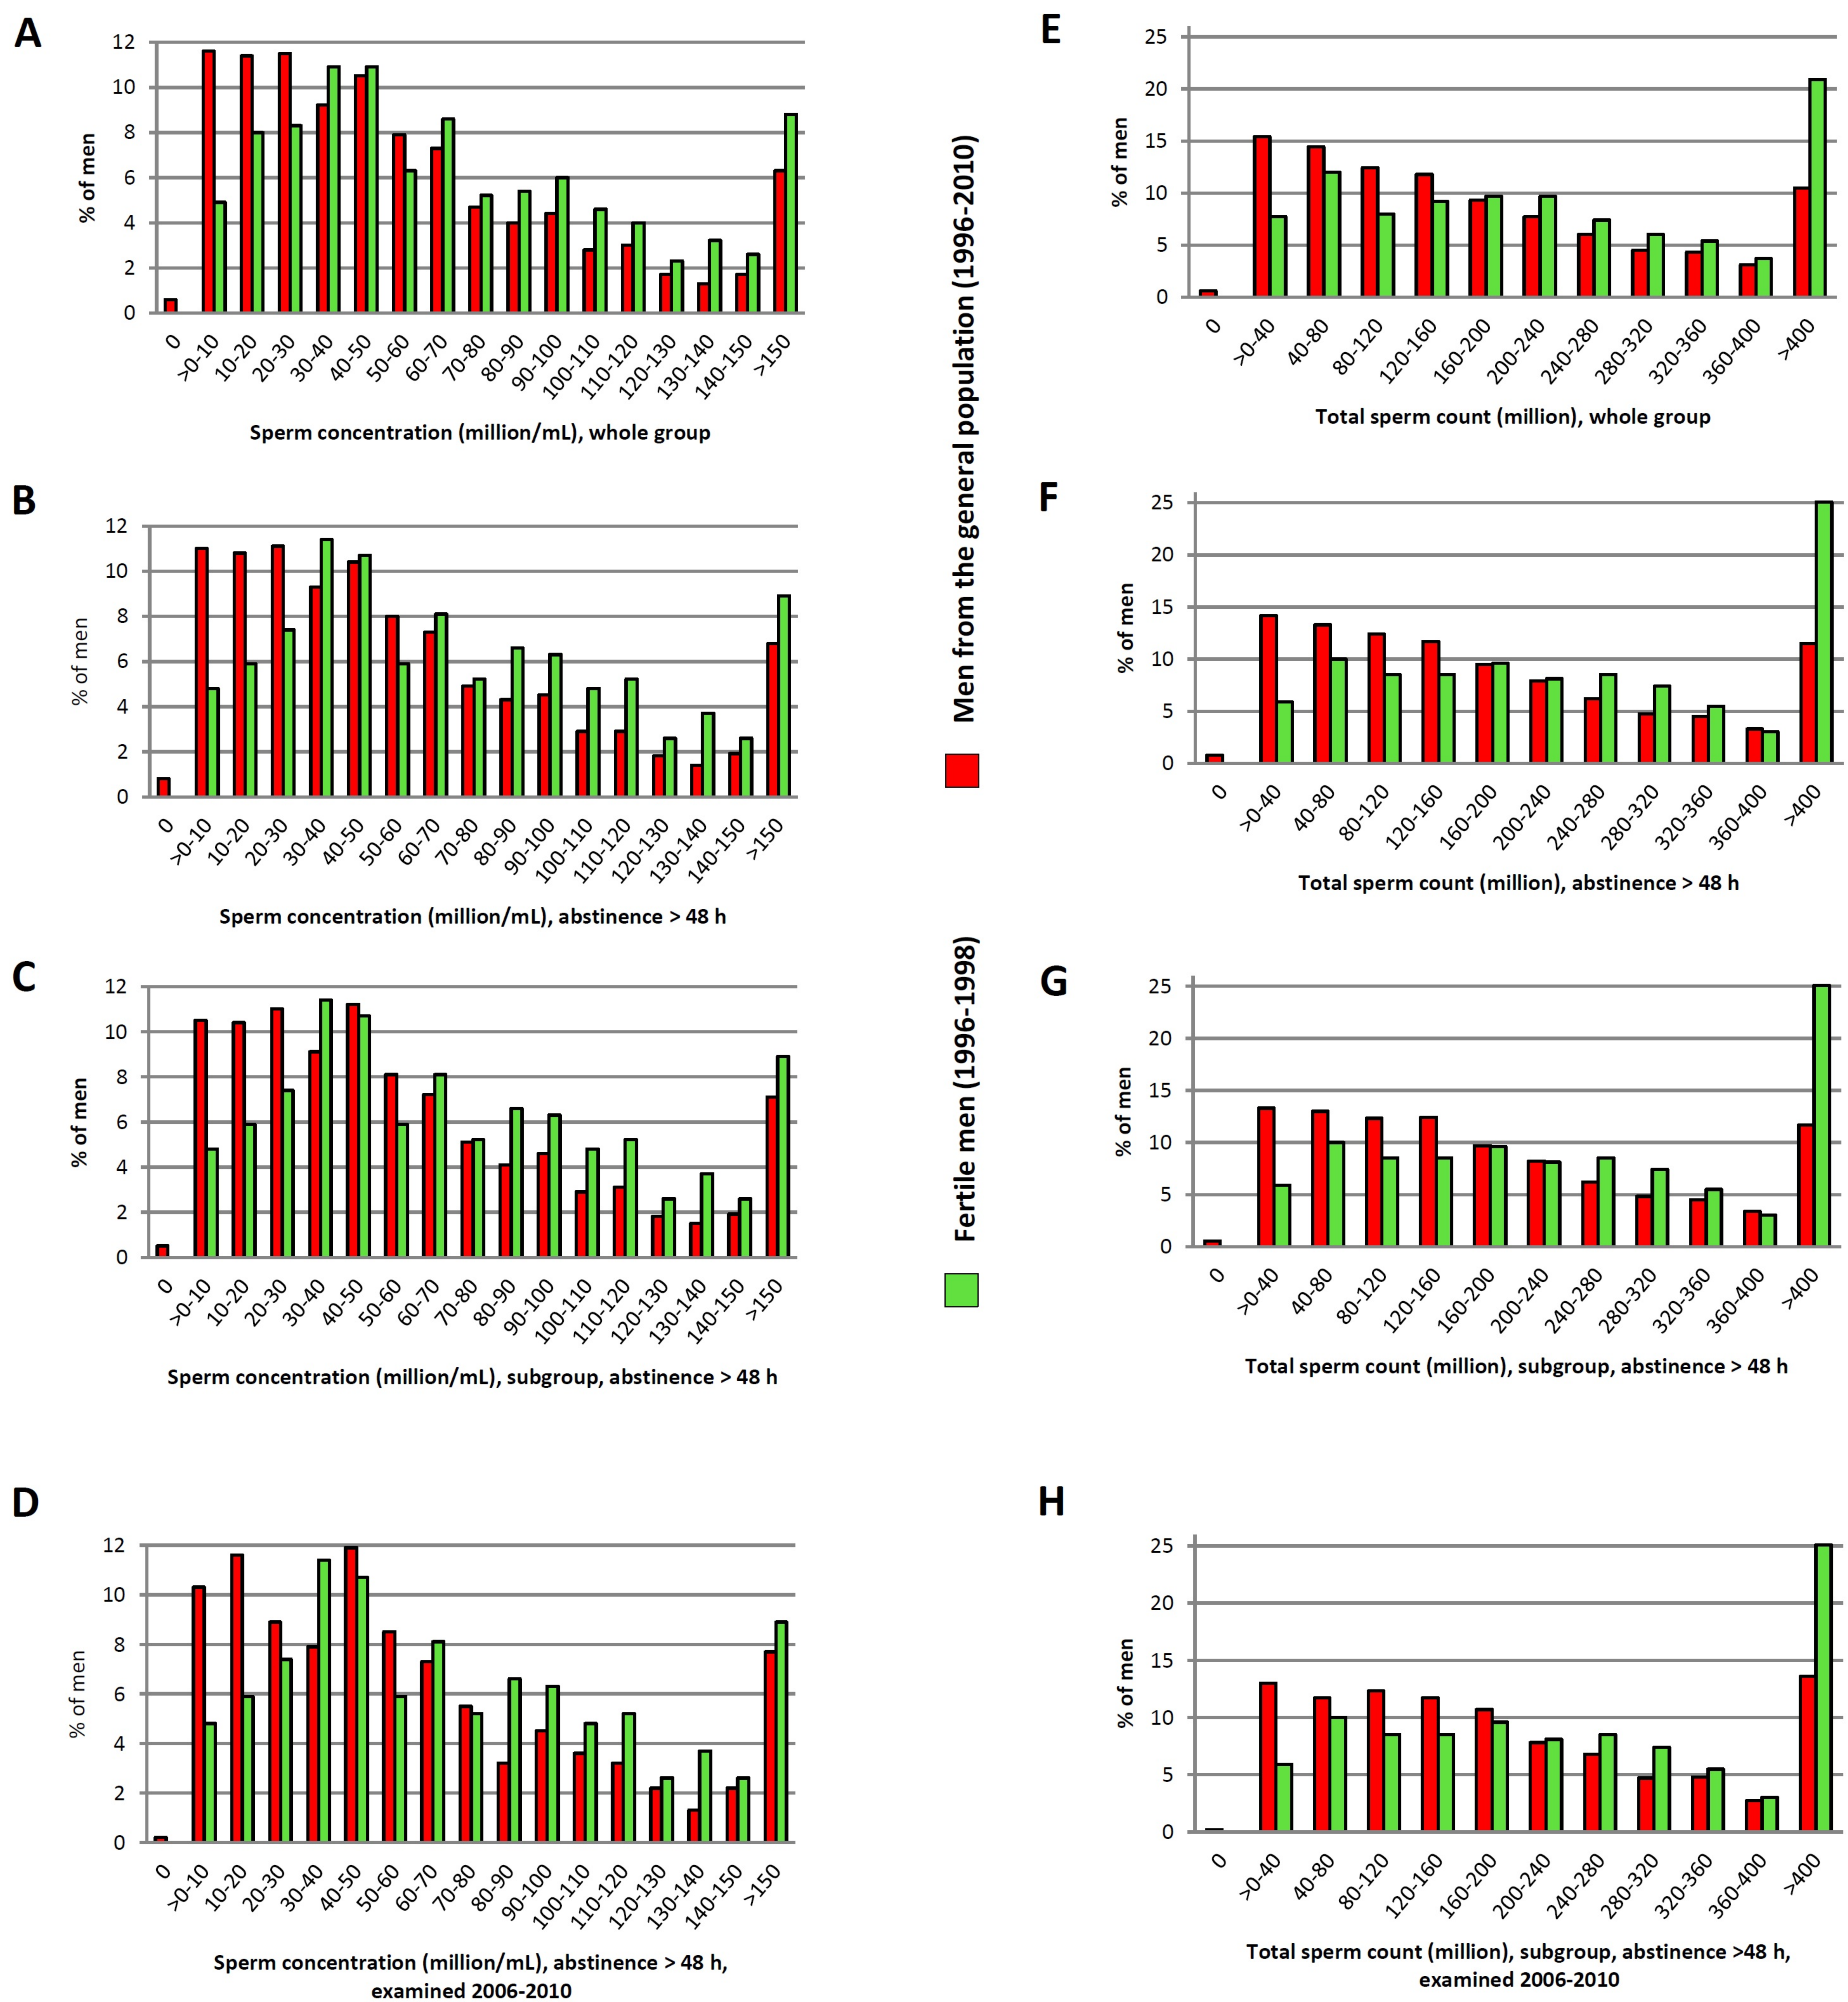

**Figure A1.1** Sperm concentration (A-D) and total sperm count (E-H) in Danish men from the general population and fertile Danish men (partners of pregnant women). Bars show percentage of men in each category. Lower sperm counts were more frequent in the men from the general population than in fertile men. The results remain the same when comparing the fertile men to different subsets of men from the general population:

- The entire groups of men (A, E)
- Only men with abstinence time > 48 hours (B, F)
- Only men with abstinence time > 48 hours, and the men from the general population belonging to the subgroup with no previous andrological adverse events (C, G)
- Only men with abstinence time > 48 hours and the men from the general population belonging to the subgroup with no previous andrological events *and* only those examined 2006-2010 (D, H).
