# Supplementary material for: Human semen quality in the new millennium: a prospective cross-sectional population-based study of 4867 men
Source: PubMed Central journal article supplement — BMJ Open. 2012 Jul 2;2(4):e000990. doi: 10.1136/bmjopen-2012-000990 (PMC3391374; doi:10.1136/bmjopen-2012-000990), 2012-07-02
Supplement: bmjopen-2012-000990-s3.pdf [file bmjopen-2012-000990-s3.pdf]

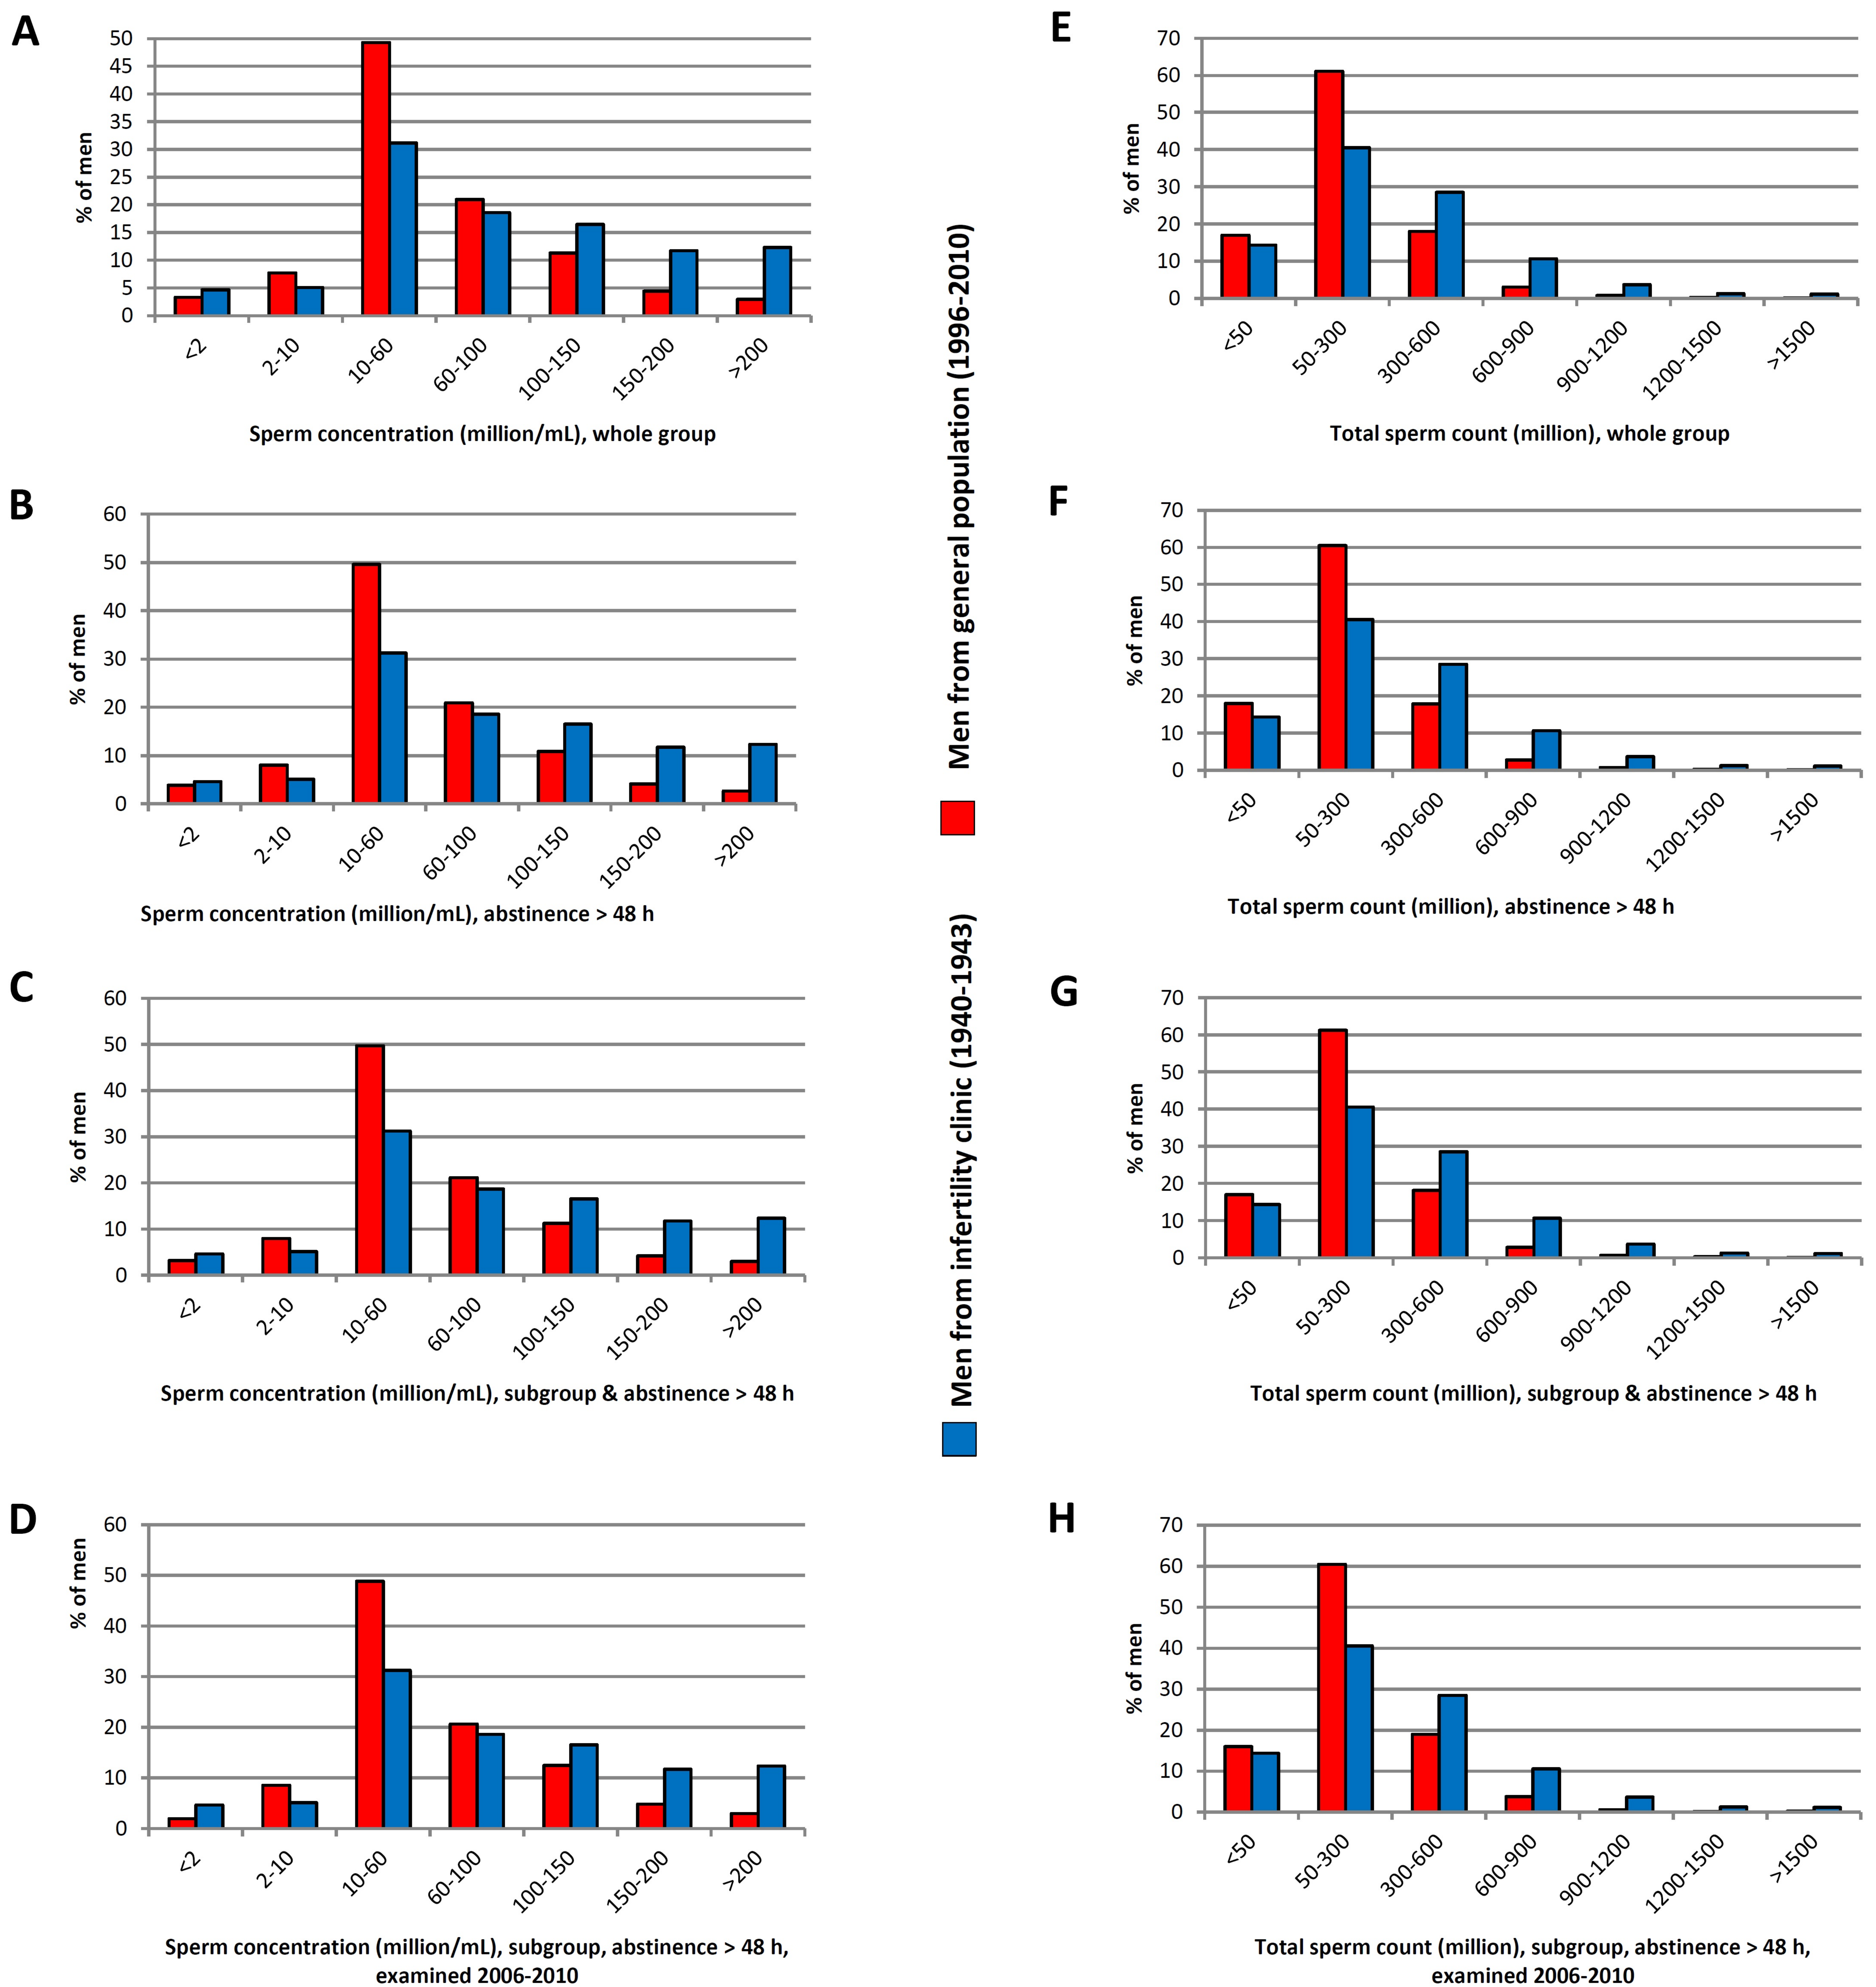

**Figure A2.** Shows distribution of sperm concentration (**A-D**) and total sperm count (**E-H**) in Danish men from the general population and men from an infertility clinic in the 1940's. For both groups sperm concentrations had been assessed by use of a Bürker-Türk haemocytometer. Bars show percentage of men in each category. The results remained the same when comparing the historical group to different subsets of the men from the general population:

- The whole group of young men (**A, E**)
- Those with abstinence time > 48 hours (**B, F**)
- The subgroup of men with no previous andrological events *and* abstinence time > 48 hours (**C, G**)
- The subgroup of men with no previous andrological events *and* abstinence time > 48 hours *and* only those examined 2006-2010 (**D, H**).

All men from the infertility clinic had ejaculation abstinence time > 48 hours.
