# Supplementary material for: Human semen quality in the new millennium: a prospective cross-sectional population-based study of 4867 men
Source: PubMed Central journal article supplement — BMJ Open. 2012 Jul 2;2(4):e000990. doi: 10.1136/bmjopen-2012-000990 (PMC3391374; doi:10.1136/bmjopen-2012-000990), 2012-07-02
Supplement: bmjopen-2012-000990-s4.pdf [file bmjopen-2012-000990-s4.pdf]

**Table A1:** Semen quality of subgroup of 3,921 young men from the general population in the Copenhagen area in Denmark.

|                                           | Mean<br>(SD)   | Median (5-95)       | all<br>periods | p-values comparing<br>2001-2005<br>vs.<br>2006-2010 |                               |
|-------------------------------------------|----------------|---------------------|----------------|-----------------------------------------------------|-------------------------------|
|                                           |                |                     |                | 2006-2010                                           | 1996-2000<br>vs.<br>2006-2010 |
| <b>Semen volume (mL)</b>                  |                |                     |                |                                                     |                               |
| Investigation period 1996-2010            | 3.4 (2.1)      | 3.2 (1.3-5.9)       |                |                                                     |                               |
| Investigation period 1996-00              | 3.3 (1.5)      | 3.1 (1.2-5.9)       |                |                                                     |                               |
| Investigation period 2001-05              | 3.3 (1.4)      | 3.2 (1.4-5.9)       |                |                                                     |                               |
| Investigation period 2006-10              | 3.5 (3.4)      | 3.2 (1.4-6.2)       | 0.02           | 0.045                                               | 0.005                         |
| <b>Sperm concentration (million/mL)</b>   |                |                     |                |                                                     |                               |
| Investigation period 1996-2010            | 61 (57)        | 47 (4-166)          |                |                                                     |                               |
| Investigation period 1996-00              | 59 (55)        | 44 (3-168)          |                |                                                     |                               |
| Investigation period 2001-05              | 62 (59)        | 47 (4-162)          |                |                                                     |                               |
| Investigation period 2006-10              | 63 (56)        | 50 (5-169)          | 0.03           | 0.18                                                | 0.009                         |
| <b>Total sperm count (million)</b>        |                |                     |                |                                                     |                               |
| Investigation period 1996-2010            | 197 (231)      | 146 (10-531)        |                |                                                     |                               |
| Investigation period 1996-2000            | 186 (182)      | 133 (8-521)         |                |                                                     |                               |
| Investigation period 2001-2005            | 197 (233)      | 151 (10-528)        |                |                                                     |                               |
| Investigation period 2006-2010            | 209 (272)      | 156 (15-562)        | 0.002          | 0.045                                               | <0.0005                       |
| <b>Normal morphology (%)</b>              |                |                     |                |                                                     |                               |
| Investigation period 1996-2010            | 7.2 (4.9)      | 6.5 (0.5-16)        |                |                                                     |                               |
| Investigation period 1996-2000            | 7.4 (5.1)      | 7.0 (1.0-17.0)      |                |                                                     |                               |
| Investigation period 2001-2005            | 6.9 (4.8)      | 6.0 (0.5-15.5)      |                |                                                     |                               |
| Investigation period 2006-2010            | 7.5 (4.8)      | 7.0 (1.0-16.5)      | 0.01           | 0.005                                               | 0.6                           |
| <b>Total normal spermatozoa (million)</b> |                |                     |                |                                                     |                               |
| Investigation period 1996-2010            | 16.8<br>(23.7) | 8.9 (0.1-58.7)      |                |                                                     |                               |
| Investigation period 1996-2000            | 16.6<br>(24.0) | 8.3 (0.02-<br>59.9) |                |                                                     |                               |
| Investigation period 2001-2005            | 15.9<br>(21.9) | 8.6 (0.04-<br>55.6) |                |                                                     |                               |
| Investigation period 2006-2010            | 18.4<br>(26.3) | 9.9 (0.2-62.9)      | 0.007          | 0.005                                               | 0.006                         |
| <b>Progressively motile (%)</b>           |                |                     |                |                                                     |                               |
| Investigation period 1996-2010            | 57 (16)        | 60 (24-77)          |                |                                                     |                               |
| Investigation period 1996-2000            | 55 (16)        | 58 (24-76)          |                |                                                     |                               |
| Investigation period 2001-2005            | 57 (16)        | 61 (23-77)          |                |                                                     |                               |
| Investigation period 2006-2010            | 57 (16)        | 60 (26-79)          | <0.0005        | 0.8                                                 | <0.0005                       |
| <b>Motile (%)</b>                         |                |                     |                |                                                     |                               |
| Investigation period 1996-2010            | 65 (15)        | 68 (37-83)          |                |                                                     |                               |
| Investigation period 1996-2000            | 65 (14)        | 68 (40-82)          |                |                                                     |                               |
| Investigation period 2001-2005            | 64 (15)        | 67 (38-82)          |                |                                                     |                               |
| Investigation period 2006-2010            | 65 (16)        | 68 (34-85)          | 0.14           | 0.05                                                | 0.2                           |

**SD:** Standard deviation.

**5-95:** 5-95 percentiles.

**p-values:** Obtained from regression analysis taking confounders into consideration.
